# Supplementary material
Source: publisher site journal article supplement (https://www.dovepress.com/article/285088)
Supplement: Supplementary file 1 [file get_supplementary_file.php]

**The Impact of Electronic Media on Patients with Inflammatory Bowel Disease**

**Supplementary Material**

Q1. Questionnaire to identify the use of the internet.

Patient's name : ………………………………………………………….

Age: …………………………………………

degree of education:……………………………

a) Inflammatory Disease classification:

1. Crohn's disease ( )

2. Ulcerative colitis ( )

b) Have you ever used the internet to search for information about your symptoms?

( ) Yes ( ) No

c) How many times have you used the internet to know about inflammatory bowel diseases?

Never ( ) Sometimes ( ) Rarely ( ) Frequently ( )

d) How often is / was your use to investigate inflammatory diseases?

1) Never ( )

2) Daily ( )

3) Once a week ( )

4) Twice a week ( )

5) More than twice a week. ( )

e) If you have ticked option 2 in the previous question, could you state how long you spend daily searching information about the disease? ¹ ................................

f) What sites have you used to search for information?

1. I don't look for information about any disease in the internet. ( )

2. Medical Sites (e.g. Pubmed). ( )

3. Ulcerative Colitis & Crohn´s Disease Sites. ( )

4. Sites used in universities and hospitals. ( )

5. Google.com ( )

6. Youtube.com ( )

7. Facebook.com ( )

8. Yahoo.com ( )

9. Wikipedia.org ( )

10. Whatsapp.com ( )

11. Self-help groups in the internet of patients with the same disease.

12. Other health sites.

j) If you have ticked items 11 or 12 from the previous question, which site(s) have you used? …………………………………………………..

h) What are the reasons which lead/ led you to do a research about inflammatory diseases on the internet?

( ) 1. I did not fully understand the doctor's explanation and so I did it to understand better.

( ) 2. I was ashamed of asking my doctor about it.

( ) 3.To complement the information given by the doctor.

( ) 4. Because I understand more easily the disease when I read information on the internet.

( ) 5. To hear about other patients with the same disease to get more information and calmness about the theme.

( ) 6. To check the information given by the doctor and question him in the next consultation.

( ) 7. To find out new information which may motive you to see another doctor.

( ) 8. to find out more information about the medicine prescribed by the doctor.

( ) 9. Other

i) If you have ticked item 9, which site have you used? …………………………

j) Do you trust the information you obtain on the internet?

( ) 1. Yes ( ) 2. No

L) Do you check if what you have read from other sources are true?

( ) 1. Yes ( ) 2. No

M) Has the use of the internet influenced you?

( ) 1. Yes ( ) 2. No

N) If you checked option **1 (YES)** of the previous item, what has changed?

( ) I had a better understanding of my disease which calmed me down

( ) I felt more stressed and anxious.

( ) It became the tool which I needed to question my doctor.

( ) The information I got made me choose another doctor

( ) The information obtained led me to a change in the medicine used.

( ) Nowadays through the internet I can handle with the disease myself, only with the advice I get through it.

O) Has the information you obtained via the internet modified your treatment behavior? ……………………………………………….
